# Supplementary material for: Cost‐Effectiveness of Monitoring Patients Post‐Stroke With Mobile ECG During the Hospital Stay
Source: PubMed Central journal article supplement — J Am Heart Assoc. 2022 Apr 12;11(8):e022735. doi: 10.1161/JAHA.121.022735 (PMC9238470; doi:10.1161/jaha.121.022735), 2022-04-12
Supplement: JAH3-11-e022735-s001.pdf [file JAH3-11-e022735-s001.pdf]

# **Supplemental Material**

## **Data S1.**

### **Supplemental Methods**

#### Transition probabilities

Mortality due to non-stroke causes by age and gender was sourced from the Australian Bureau of Statistics<sup>47</sup>. Since AF is associated with increased risk of death from other causes, a relative risk (RR) factor was applied to adjust this altered mortality<sup>48</sup>. For patients receiving NOAC treatment, the risk of having another recurrent event was reduced by applying the treatment effect of apixaban as a representative NOAC, whereas patients with undiagnosed AF (i.e. those who remain undiagnosed by Holter surveillance) would have unadjusted risk for such event.

#### Model assumptions

A key assumption was that patients from a post major stroke state could not return to the post non-major stroke state. A microsimulation approach was selected because it has the advantages of modelling for a heterogeneous population (i.e., subjects may vary in terms of baseline characteristics, thus with different transition probabilities of experiencing recurrent events) and tracking individual subjects over their lifetime. It enables the storing of event histories for each subject (i.e. the number of strokes occurring over the modelled time horizon, and the time point at which each event occurred).

#### Subgroup analysis

A subgroup analysis based on patients aged over 65 years was undertaken given the higher risk of AF in this aged cohort.

#### Example calculation for QALY gain

A utility weight of 0.5 (meaning the quality of life of 0.5 for a given health state) times 10 life years lived in that health state gives the equals 5 QALYs of 5.

## Data S2.

### Supplemental Results

Results of subgroup cost-effectiveness analysis (cohort aged over 65 years)

In the subgroup of patients aged 65 years and over, the same rate of detection was 10.3% in the iECG and 4.0% in the 24-Holter recording groups ( $p < 0.001$ ). Similarly, iECG again led to higher costs and benefits. Over the simulated time horizon, the total costs and QALYs were \$26,119 vs. \$25,888, and 5.603 vs. 5.565 in the iECG and usual care groups respectively. The corresponding ICER was \$6052/QALY. Moreover, monitoring post stroke patients with iECG was associated with fewer numbers of recurrent strokes (2,860 vs 2,980) and stroke-related death (530 vs. 540) per 10,000 patients.

Comparison with other monitoring protocols

Further, ambulatory 7-day ECG monitoring also detected 5.7% of AF in patients with normal ECG and normal Holter<sup>49</sup>. Another study that extended the monitoring to 30-days using an event-triggered record yielded a significantly higher proportion of AF detection (16.1%) than that using a 24-hour Holter (3.2%) surveillance<sup>50</sup> in patients with cryptogenic stroke/TIA<sup>51</sup>. These results highlight the fact that using the traditional short-term cardiac surveillance protocol, a significant proportion of patients with unknown AF could be missed and therefore would not benefit from NOAC therapy. Monitoring post-stroke patients after hospital discharge for a longer timeframe may be able to detect a greater proportion of patients with AF, but it raises feasibility concerns (human resources, compliance, costs, etc.). Improving AF detection during the index hospital admission could overcome some of the issues especially with the evidence showing that early monitoring is important to identify the majority of AF<sup>52,53</sup>.

**Table S1. Probability of recurrent stroke by CHA2DS2-VASc score.**

| <b>CHA2DS2-VASc score</b> | <b>Probability of recurrent stroke per annual</b> |
|---------------------------|---------------------------------------------------|
| 0                         | 0                                                 |
| 1                         | 0.013                                             |
| 2                         | 0.022                                             |
| 3                         | 0.032                                             |
| 4                         | 0.04                                              |
| 5                         | 0.067                                             |
| 6                         | 0.098                                             |
| 7                         | 0.096                                             |
| 8                         | 0.125                                             |
| 9                         | 0.152                                             |

CHA2DS2-VASc scores calculates the stroke risk for patients with AF.  
Reference 20

**Table S2. Background mortality.**

| <b>Age</b> | <b>Mortality rate_noAF_male</b> | <b>Mortality rate_noAF_female</b> | <b>Mortality rate_AF_male</b> | <b>Mortality rate_AF_female</b> |
|------------|---------------------------------|-----------------------------------|-------------------------------|---------------------------------|
| 64         | 0.00929                         | 0.00538                           | 0.015421                      | 0.008931                        |
| 65         | 0.0101                          | 0.0059                            | 0.016766                      | 0.009794                        |
| 66         | 0.01099                         | 0.00653                           | 0.018243                      | 0.01084                         |
| 67         | 0.012                           | 0.00725                           | 0.01992                       | 0.012035                        |
| 68         | 0.01317                         | 0.00805                           | 0.021862                      | 0.013363                        |
| 69         | 0.01449                         | 0.00891                           | 0.024053                      | 0.014791                        |
| 70         | 0.01602                         | 0.00988                           | 0.026593                      | 0.016401                        |
| 71         | 0.01776                         | 0.01098                           | 0.029482                      | 0.018227                        |
| 72         | 0.01972                         | 0.01223                           | 0.032735                      | 0.020302                        |
| 73         | 0.02191                         | 0.01367                           | 0.036371                      | 0.022692                        |
| 74         | 0.0243                          | 0.0153                            | 0.040338                      | 0.025398                        |
| 75         | 0.02699                         | 0.01717                           | 0.044803                      | 0.028502                        |
| 76         | 0.03006                         | 0.01931                           | 0.0499                        | 0.032055                        |
| 77         | 0.03358                         | 0.02179                           | 0.055743                      | 0.036171                        |
| 78         | 0.03758                         | 0.02467                           | 0.062383                      | 0.040952                        |
| 79         | 0.04216                         | 0.028                             | 0.069986                      | 0.04648                         |
| 80         | 0.04752                         | 0.0319                            | 0.078883                      | 0.052954                        |
| 81         | 0.05366                         | 0.03646                           | 0.089076                      | 0.060524                        |
| 82         | 0.06054                         | 0.04178                           | 0.100496                      | 0.069355                        |
| 83         | 0.06828                         | 0.04793                           | 0.113345                      | 0.079564                        |
| 84         | 0.07722                         | 0.05503                           | 0.128185                      | 0.09135                         |
| 85         | 0.08735                         | 0.06311                           | 0.145001                      | 0.104763                        |
| 86         | 0.09862                         | 0.07221                           | 0.163709                      | 0.119869                        |
| 87         | 0.1109                          | 0.08258                           | 0.184094                      | 0.137083                        |
| 88         | 0.12427                         | 0.09437                           | 0.206288                      | 0.156654                        |
| 89         | 0.13867                         | 0.10778                           | 0.230192                      | 0.178915                        |
| 90         | 0.15409                         | 0.1229                            | 0.255789                      | 0.204014                        |
| 91         | 0.17078                         | 0.13957                           | 0.283495                      | 0.231686                        |
| 92         | 0.18851                         | 0.15789                           | 0.312927                      | 0.262097                        |
| 93         | 0.20688                         | 0.17768                           | 0.343421                      | 0.294949                        |
| 94         | 0.22531                         | 0.19844                           | 0.374015                      | 0.32941                         |
| 95         | 0.23916                         | 0.21042                           | 0.397006                      | 0.349297                        |
| 96         | 0.25101                         | 0.23459                           | 0.416677                      | 0.389419                        |
| 97         | 0.26474                         | 0.25393                           | 0.439468                      | 0.421524                        |
| 98         | 0.28313                         | 0.27387                           | 0.469996                      | 0.454624                        |
| 99         | 0.31095                         | 0.29699                           | 0.516177                      | 0.493003                        |
| 100        | 0.34231                         | 0.31683                           | 0.568235                      | 0.525938                        |

Australian Bureau of Statistics, Table 1.9 Life Tables, Australia, 2015-2017

**Table S3. Distributions for first-order uncertainty examined in the simulation model.**

| <b>Variables</b>                             | <b>Distribution</b> | <b>Parameters</b>             | <b>Range (AUD)</b> |
|----------------------------------------------|---------------------|-------------------------------|--------------------|
| Cost of rehospitalisation                    |                     |                               |                    |
| Major stroke                                 | Gamma               | Alpha 95.80<br>Lambda 0.0055  | \$14,212-21,235    |
| Non-major stroke                             | Gamma               | Alpha 99.99<br>Lambda 0.0015  | \$5,372-7,959      |
| Cost of management post a major stroke       | Gamma               | Alpha 100.0<br>Lambda 0.0089  | \$9,162-13,573     |
| Cost of intracranial haemorrhage due to NOAC | Gamma               | Alpha 100<br>Lambda 0.0043    | \$19,060-28,235    |
| Cost of dying immediately from acute stroke  | Gamma               | Alpha 100<br>Lambda 0.0087    | \$9,302-13,779     |
| Cost of rehabilitation post of major stroke  | Gamma               | Alpha 425.48<br>Lambda 0.0064 | \$60,340-73,976    |

NOAC: new oral anticoagulant.; AUD: Australian dollar.

Due to the absence of evidence to inform the distribution, we adopted the distribution recommended for costs in the book entitled Decision Modelling for Health Economic Evaluation - Handbooks in Health Economic Evaluation Series

**Table S4. Distributions examined in the probabilistic sensitivity analyses.**

| <b>Variable</b>                                                     | <b>Distribution</b> | <b>Parameters</b>               | <b>Reference</b>     |
|---------------------------------------------------------------------|---------------------|---------------------------------|----------------------|
| Probability of recurrent stroke (no AF patients)                    | Beta                | Alpha 24.4774;<br>beta 1193.304 | Expert opinion       |
| RR of stroke for patients treated with NOAC vs no NOAC              | Beta                | Alpha 3.3115;<br>Beta 5.6384    | Connolly et al. 2011 |
| RR of all-cause mortality for patients treated with NOAC vs no NOAC | Beta                | Alpha 2.3593;<br>Beta 0.6272    | Connolly et al. 2011 |
| Baseline utility post Stroke/TIA                                    | Beta                | Alpha 8.62; beta<br>5.0625      | Expert opinion       |

AF: atrial fibrillation; NOAC: new oral anticoagulant; TIA: transient ischemic attack; RR: relative risk

Beta distribution is characterised by alpha and beta parameters ranging from zero to one.

**Table S5. Results of cost-effectiveness analysis for the subgroup (aged 65 years and over).**

|                                        | <b>iECG</b> | <b>Usual care</b> | <b>Difference</b> | <b>ICER</b> |
|----------------------------------------|-------------|-------------------|-------------------|-------------|
| <b>Total cost</b>                      | \$26,119    | \$25,888          | \$230             |             |
| • <b>Management</b>                    | \$18,299    | \$18,190          | \$109             |             |
| • <b>Rehabilitation</b>                | \$4,780     | \$4,930           | -\$150            |             |
| • <b>Hospitalisation</b>               | \$2,387     | \$2,474           | -\$86             |             |
| • <b>NOAC</b>                          | \$555       | \$262             | \$293             |             |
| • <b>Adverse events</b>                | \$70        | \$33              | \$37              |             |
| • <b>iECG device</b>                   | \$27        | \$0               | \$27              |             |
| <b>Number of recurrent stroke*</b>     | 0.286       | 0.298             | -0.012            | \$19,599    |
| <b>Number of stroke-related death*</b> | 0.053       | 0.054             | -0.001            | \$200,252   |
| <b>QALY</b>                            | 5.603       | 5.565             | 0.038             | \$6,052     |
| <b>LY</b>                              | 9.610       | 9.562             | 0.048             | \$4,759     |

\*the average number of events across all simulated cohort since not all patients would experience an event over the modelled time horizon.



**Table S6. Results from national impact.**

| Calendar year | Cost of devices | Cost-offset     | Cost of NOAC and AEs |
|---------------|-----------------|-----------------|----------------------|
| 2017          | \$677,376       | -\$7,777,280    | \$9,658,880          |
| 2018          | \$657,055       | -\$7,543,962    | \$9,369,114          |
| 2019          | \$637,343       | -\$7,317,643    | \$9,088,040          |
| 2020          | \$618,223       | -\$7,098,113    | \$8,815,399          |
| 2021          | \$599,676       | -\$6,885,170    | \$8,550,937          |
| Total         | \$3,189,673     | -\$36,622,168   | \$45,482,370         |
|               |                 | <b>Net cost</b> | <b>\$12,049,875</b>  |

A total of 56,000 stroke occurred in 2017 with an estimated 25,088 patients survived without no prior atrial fibrillation.

NOAC: new oral anticoagulant; AEs: adverse events.

**Figure S1 Tornado diagram for the one-way sensitivity analysis\_ patients aged over 65 years.**

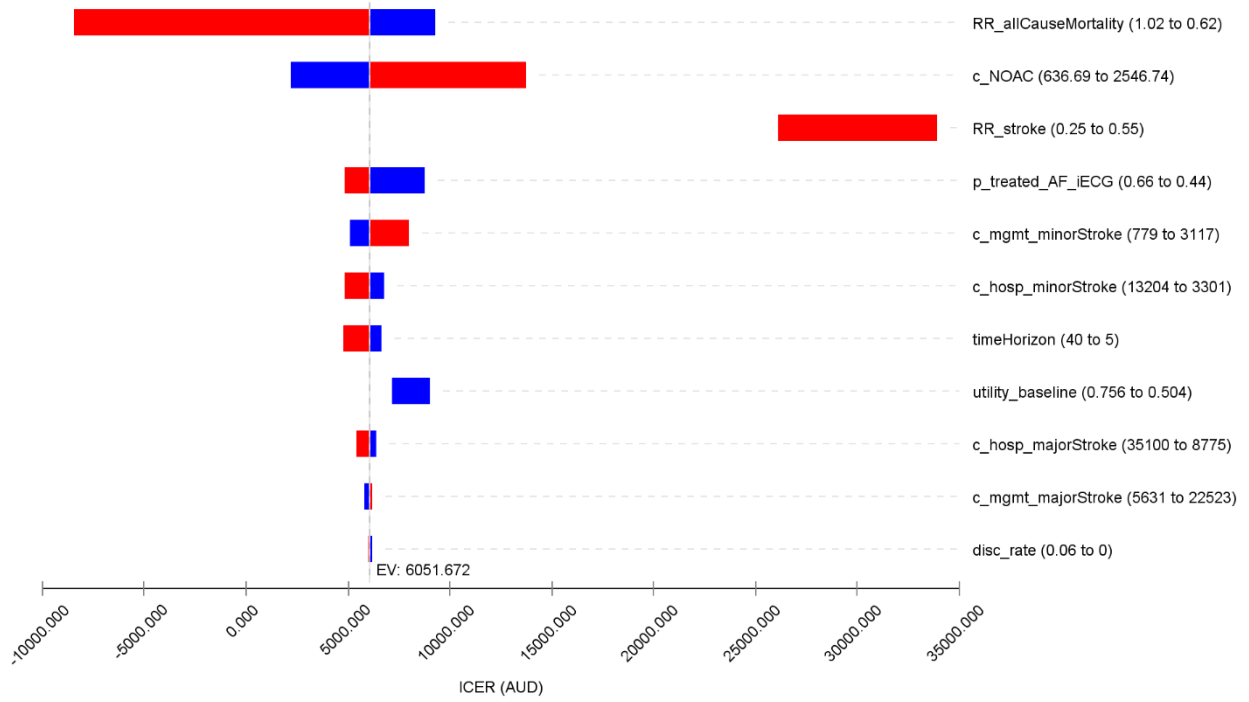

**Figure S2. Incremental cost-effectiveness plane from the probabilistic sensitivity analysis\_ patients aged over 65 years,**

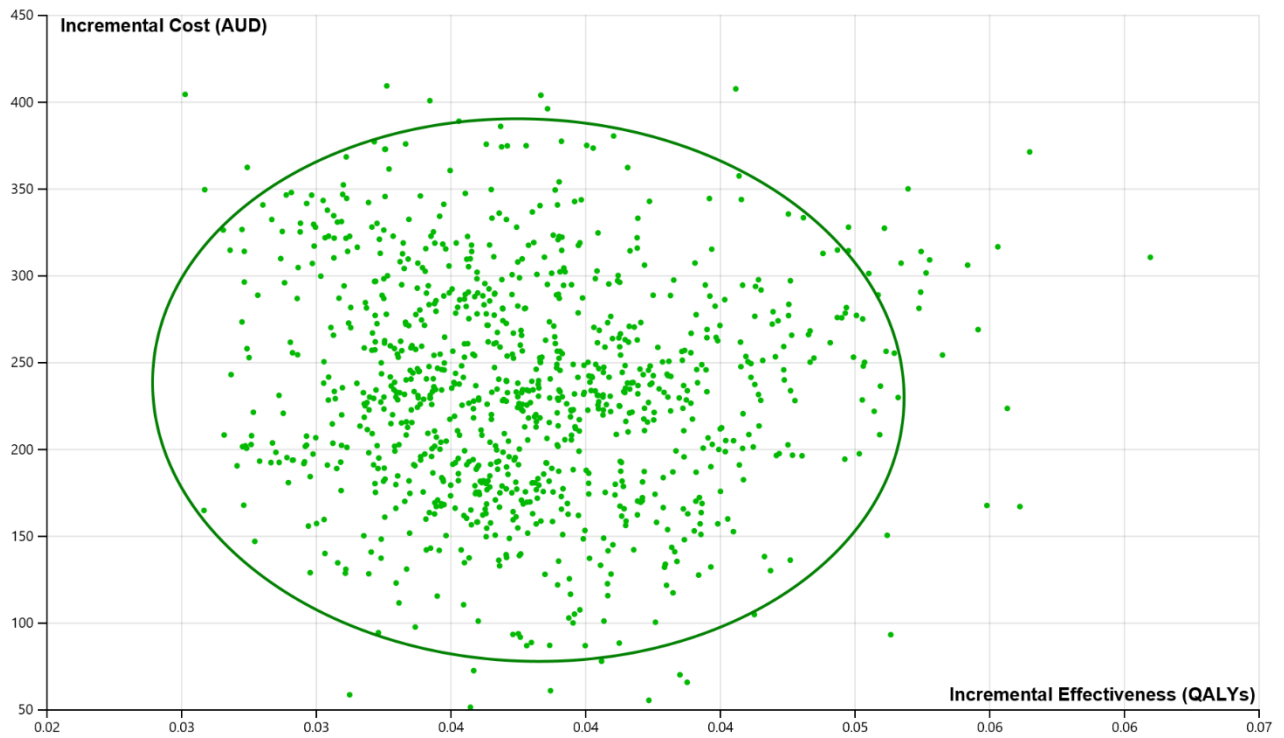

AUD: Australian dollar; QALY: quality-adjusted life year

Probability of being cost-effective is 100% using the \$50,000/QALY WTP threshold. Red dots represent the results suggesting cost-ineffective (none in the figure above) whereas green dots denote the results indicating cost-effective.
